# Supplementary material for: A Model Based Cost-Effectiveness Analysis of Routine Genotyping for CYP2D6 among Older, Depressed Inpatients Starting Nortriptyline Pharmacotherapy
Source: PubMed Central journal article supplement (PMC5199075; doi:10.1371/journal.pone.0169065), 2016-12-29

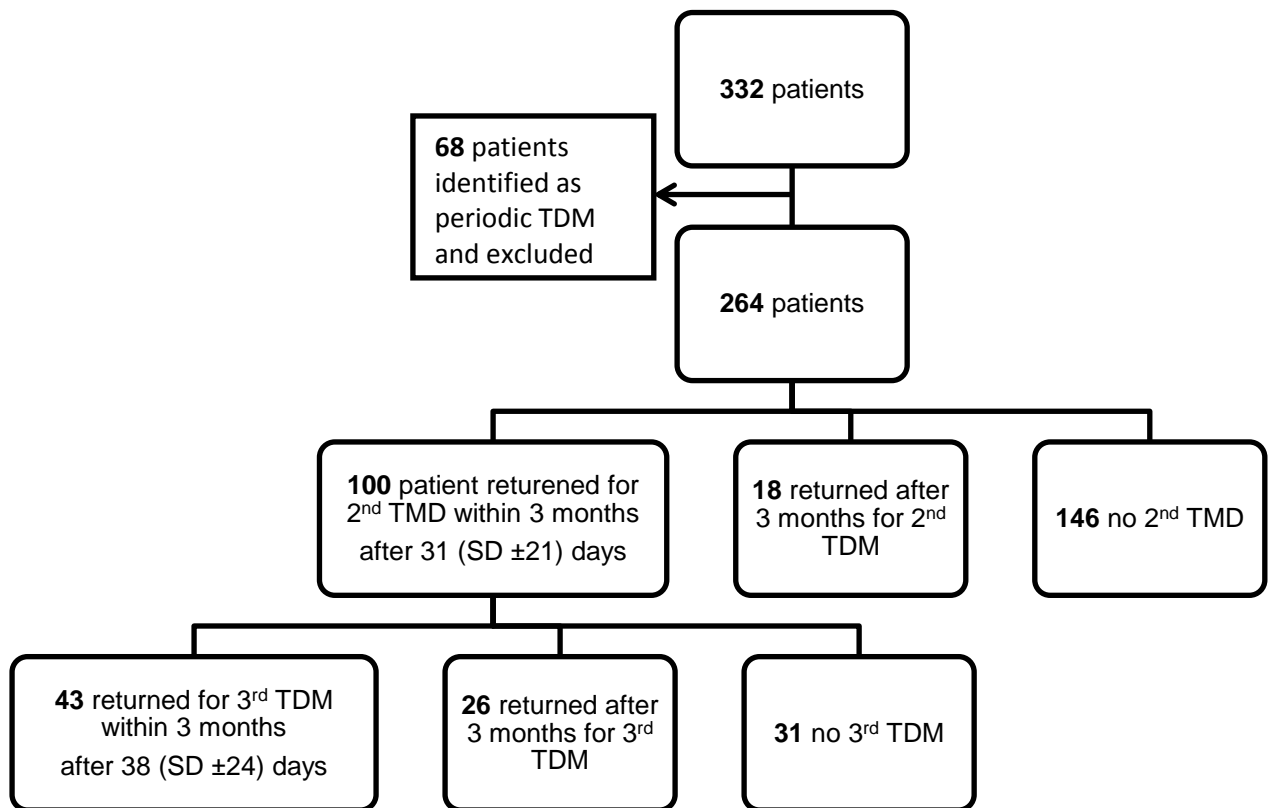

Supplement: pone.0169065.s001.pdf [file pone.0169065.s001.pdf]
