# Supplementary material for: A Model Based Cost-Effectiveness Analysis of Routine Genotyping for CYP2D6 among Older, Depressed Inpatients Starting Nortriptyline Pharmacotherapy
Source: PubMed Central journal article supplement (PMC5199075; doi:10.1371/journal.pone.0169065), 2016-12-29
Supplement: pone.0169065.s002.pdf [file pone.0169065.s002.pdf]

| <b>Care as usual cohort</b>                                                               |                            |                                          |                                           |
|-------------------------------------------------------------------------------------------|----------------------------|------------------------------------------|-------------------------------------------|
| <b>Genotype</b>                                                                           | Starting dose (mg per day) | Dose after first evaluation (mg per day) | Dose after second evaluation (mg per day) |
| <b>PM</b>                                                                                 | 75                         | If too high: 50                          | If too high: 25                           |
| <b>IM</b>                                                                                 | 75                         | If too high: 50                          | If too high: 25                           |
| <b>EM</b>                                                                                 | 75                         | If too low: 100<br>If too high: 50       | If too low: 125<br>If too high: 25        |
| <b>UM</b>                                                                                 | 75                         | If too low: 100                          | If too low: 125                           |
| <b>Genotyping cohort</b>                                                                  |                            |                                          |                                           |
| <b>Genotype</b>                                                                           | Starting dose (mg per day) | Dose after first evaluation (mg per day) | Dose after second evaluation (mg per day) |
| <b>PM</b>                                                                                 | 30                         | If too high: 25                          | If too high: 10                           |
| <b>IM</b>                                                                                 | 75                         | If too high: 50                          | If too high: 25                           |
| <b>EM</b>                                                                                 | 75                         | If too low: 100<br>If too high: 50       | If too low: 125<br>If too high: 25        |
| <b>UM</b>                                                                                 | 125                        | If too low: 150                          | If too low: 175                           |
| <b>Genotyping cohort (as included in scenario analysis with dose adaptations for IMs)</b> |                            |                                          |                                           |
| <b>Genotype</b>                                                                           | Starting dose (mg per day) | Dose after first evaluation (mg per day) | Dose after second evaluation (mg per day) |
| <b>PM</b>                                                                                 | 30                         | If too high: 25                          | If too high: 10                           |
| <b>IM</b>                                                                                 | 50                         | If too low: 75<br>If too high: 30        | If too low: 100<br>If too high: 25        |
| <b>EM</b>                                                                                 | 75                         | If too low: 100<br>If too high: 50       | If too low: 125<br>If too high: 25        |
| <b>UM</b>                                                                                 | 125                        | If too low: 150                          | If too low: 175                           |
